# Supplementary material
Source: Springer Nature journal article supplement (https://www.springermedizin.de/resource/supplementary/12884_2009_295_MOESM2_ESM.pdf/9457396)
Supplement: MOESM2 [file 9457396]

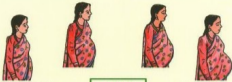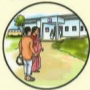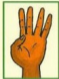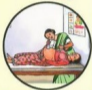

## १. गर्भवती जाँच

आमा र बच्चाको स्वास्थ्यको लागि गर्भवती महिलाले कम्तीमा चार पटक गर्भको जाँच गराउनुपर्छ:

- पहिलो पटक: गर्भवती भएको थाहा पाउने बित्तिकै
- दोस्रो पटक: गर्भवती भएको पाँच महिना देखि सात महिना सम्ममा
- तेस्रो पटक: ८ महिना पुरा भएपछि
- चौथो पटक: अन्तिम महिना अथवा बच्चा जन्मिने हुलामा

चार पटक बाहेक कुनै पनि बेला समस्या देखापर्येमा गर्भवती महिलाले नजिकको स्वास्थ्य संस्थामा गई जाँच गराउनु पर्छ ।
